# Supplementary material
Source: publisher figshare collection journal article supplement (https://sage.figshare.com/ndownloader/files/18716147)
Supplement: Supplementary file 1 [file 18716147]

Table 2. Literacy Scores by Student Subgroups

|  | Intervention (*n* = 40) | | | | Control (*n* = 40) | | | | Intervention vs. Control | | | |
| --- | --- | --- | --- | --- | --- | --- | --- | --- | --- | --- | --- | --- |
|  | Male (*n* = 25) | | Female  (*n* = 15) | | Male (*n* = 30) | | Female  (*n* = 10) | | Male | | Female | |
| Variable | *M* | *SD* | *M* | *SD* | *M* | *SD* | *M* | *SD* | *p* | *d* | *p* | *d* |
| GMRT |  |  |  |  |  |  |  |  |  |  |  |  |
| *Pretest (Sept)* | 0.29 | 0.16 | 0.30 | 0.17 | 0.26 | 0.20 | 0.35 | 0.17 | .519 | 0.18 | .509 | –0.28 |
| *2 months (Nov)* | 0.38 | 0.16 | 0.34 | 0.19 | 0.34 | 0.19 | 0.41 | 0.23 | .530 | 0.21 | .511 | –0.33 |
| *4 months (Jan)* | 0.41 | 0.17 | 0.42 | 0.15 | 0.34 | 0.16 | 0.45 | 0.20 | .204 | 0.41 | .797 | –0.20 |
| *6 months (Mar)* | 0.52 | 0.19 | 0.46 | 0.17 | 0.41 | 0.17 | 0.49 | 0.20 | .067 | 0.61 | .835 | –0.16 |
| *9 months (June)* | 0.57 | 0.20 | 0.52 | 0.18 | 0.43 | 0.16 | 0.53 | 0.23 | .010 | 0.82 | .974 | –0.05 |
|  |  |  |  |  |  |  |  |  |  |  |  |  |
| NVLA |  |  |  |  |  |  |  |  |  |  |  |  |
| *Pretest (Sept)* | 0.39 | 0.16 | 0.44 | 0.24 | 0.38 | 0.21 | 0.45 | 0.19 | .601 | 0.07 | .687 | –0.06 |
| *2 months (Nov)* | 0.53 | 0.18 | 0.51 | 0.22 | 0.45 | 0.23 | 0.50 | 0.21 | .219 | 0.36 | .812 | 0.05 |
| *4 months (Jan)* | 0.59 | 0.18 | 0.59 | 0.21 | 0.49 | 0.22 | 0.54 | 0.16 | .144 | 0.48 | .348 | 0.27 |
| *6 months (Mar)* | 0.65 | 0.21 | 0.63 | 0.19 | 0.51 | 0.22 | 0.60 | 0.19 | .046 | 0.66 | .579 | 0.12 |
| *9 months (June)* | 0.70 | 0.20 | 0.68 | 0.21 | 0.56 | 0.21 | 0.61 | 0.21 | .042 | 0.67 | .305 | 0.33 |
|  |  |  |  |  |  |  |  |  |  |  |  |  |
|  |  |  |  |  |  |  |  |  |  |  |  |  |
|  | ID (*n* = 22) | | Autism  (*n* = 18) | | ID (*n* = 23) | | Autism  (*n* = 17) | | ID | | Autism | |
| Variable | *M* | *SD* | *M* | *SD* | *M* | *SD* | *M* | *SD* | *p* | *d* | *p* | *d* |
| GMRT |  |  |  |  |  |  |  |  |  |  |  |  |
| *Pretest (Sept)* | 0.32 | 0.15 | 0.26 | 0.17 | 0.34 | 0.19 | 0.19 | 0.17 | .645 | –0.14 | .246 | 0.40 |
| *2 months (Nov)* | 0.41 | 0.16 | 0.32 | 0.17 | 0.39 | 0.21 | 0.32 | 0.18 | .836 | 0.06 | .968 | 0.01 |
| *4 months (Jan)* | 0.43 | 0.16 | 0.39 | 0.17 | 0.40 | 0.18 | 0.33 | 0.17 | .490 | 0.21 | .353 | 0.33 |
| *6 months (Mar)* | 0.53 | 0.17 | 0.45 | 0.19 | 0.45 | 0.18 | 0.41 | 0.17 | .155 | 0.44 | .496 | 0.25 |
| *9 months (June)* | 0.55 | 0.20 | 0.55 | 0.19 | 0.48 | 0.20 | 0.43 | 0.17 | .211 | 0.39 | .057 | 0.71 |
|  |  |  |  |  |  |  |  |  |  |  |  |  |
| NVLA |  |  |  |  |  |  |  |  |  |  |  |  |
| *Pretest (Sept)* | 0.44 | 0.19 | 0.36 | 0.19 | 0.46 | 0.21 | 0.30 | 0.17 | .760 | –0.09 | .338 | 0.33 |
| *2 months (Nov)* | 0.56 | 0.21 | 0.47 | 0.17 | 0.51 | 0.24 | 0.41 | 0.18 | .437 | 0.23 | .247 | 0.40 |
| *4 months (Jan)* | 0.63 | 0.19 | 0.54 | 0.17 | 0.56 | 0.20 | 0.42 | 0.19 | .249 | 0.35 | .074 | 0.64 |
| *6 months (Mar)* | 0.68 | 0.19 | 0.59 | 0.21 | 0.60 | 0.22 | 0.45 | 0.18 | .193 | 0.40 | .048 | 0.74 |
| *9 months (June)* | 0.72 | 0.19 | 0.66 | 0.21 | 0.62 | 0.21 | 0.52 | 0.20 | .098 | 0.52 | .071 | 0.67 |
|  |  |  |  |  |  |  |  |  |  |  |  |  |
|  |  |  |  |  |  |  |  |  |  |  |  |  |
|  | Nonverbal  (*n* = 12) | | Verbal  (*n* = 28) | | Nonverbal  (*n* = 12) | | Verbal  (*n* = 28) | | Nonverbal | | Verbal | |
| Variable | *M* | *SD* | *M* | *SD* | *M* | *SD* | *M* | *SD* | *p* | *d* | *p* | *d* |
| GMRT |  |  |  |  |  |  |  |  |  |  |  |  |
| *Pretest (Sept)* | 0.19 | 0.17 | 0.34 | 0.14 | 0.30 | 0.20 | 0.27 | 0.19 | .165 | –0.59 | .141 | 0.40 |
| *2 months (Nov)* | 0.31 | 0.15 | 0.39 | 0.17 | 0.36 | 0.20 | 0.36 | 0.20 | .430 | –0.33 | .505 | 0.18 |
| *4 months (Jan)* | 0.31 | 0.19 | 0.46 | 0.13 | 0.39 | 0.20 | 0.36 | 0.17 | .301 | –0.45 | .025 | 0.62 |
| *6 months (Mar)* | 0.41 | 0.19 | 0.53 | 0.16 | 0.44 | 0.19 | 0.43 | 0.18 | .670 | –0.19 | .040 | 0.58 |
| *9 months (June)* | 0.51 | 0.19 | 0.57 | 0.19 | 0.45 | 0.23 | 0.46 | 0.17 | .526 | 0.28 | .031 | 0.61 |
|  |  |  |  |  |  |  |  |  |  |  |  |  |
| NVLA |  |  |  |  |  |  |  |  |  |  |  |  |
| *Pretest (Sept)* | 0.27 | 0.16 | 0.47 | 0.17 | 0.37 | 0.17 | 0.41 | 0.22 | .167 | –0.58 | .275 | 0.29 |
| *2 months (Nov)* | 0.39 | 0.15 | 0.58 | 0.19 | 0.41 | 0.20 | 0.49 | 0.23 | .727 | –0.14 | .103 | 0.44 |
| *4 months (Jan)* | 0.45 | 0.15 | 0.65 | 0.17 | 0.46 | 0.15 | 0.52 | 0.22 | .811 | –0.10 | .022 | 0.63 |
| *6 months (Mar)* | 0.47 | 0.18 | 0.71 | 0.17 | 0.48 | 0.21 | 0.56 | 0.22 | .923 | –0.04 | .009 | 0.75 |
| *9 months (June)* | 0.56 | 0.21 | 0.74 | 0.18 | 0.51 | 0.19 | 0.60 | 0.21 | .619 | 0.22 | .012 | 0.71 |
|  |  |  |  |  |  |  |  |  |  |  |  |  |
|  |  |  |  |  |  |  |  |  |  |  |  |  |
|  | Grade K-1  (*n* = 20) | | Grade 2-4  (*n* = 20) | | Grade K-1  (*n* = 18) | | Grade 2-4  (*n* = 22) | | Grade K-1 | | Grade 2-4 | |
| Variable | *M* | *SD* | *M* | *SD* | *M* | *SD* | *M* | *SD* | *p* | *d* | *p* | *d* |
| GMRT |  |  |  |  |  |  |  |  |  |  |  |  |
| *Pretest (Sept)* | 0.24 | 0.16 | 0.35 | 0.15 | 0.18 | 0.12 | 0.36 | 0.20 | .187 | 0.44 | .775 | –0.09 |
| *2 months (Nov)* | 0.29 | 0.14 | 0.44 | 0.17 | 0.28 | 0.17 | 0.43 | 0.20 | .839 | 0.07 | .789 | 0.08 |
| *4 months (Jan)* | 0.37 | 0.16 | 0.45 | 0.16 | 0.29 | 0.14 | 0.43 | 0.18 | .099 | 0.57 | .741 | 0.10 |
| *6 months (Mar)* | 0.47 | 0.20 | 0.52 | 0.16 | 0.37 | 0.14 | 0.49 | 0.19 | .113 | 0.57 | .509 | 0.21 |
| *9 months (June)* | 0.56 | 0.21 | 0.55 | 0.18 | 0.39 | 0.15 | 0.50 | 0.20 | .014 | 0.91 | .450 | 0.24 |
|  |  |  |  |  |  |  |  |  |  |  |  |  |
| NVLA |  |  |  |  |  |  |  |  |  |  |  |  |
| *Pretest (Sept)* | 0.32 | 0.17 | 0.49 | 0.18 | 0.30 | 0.14 | 0.47 | 0.22 | .659 | 0.14 | .759 | 0.10 |
| *2 months (Nov)* | 0.42 | 0.15 | 0.62 | 0.19 | 0.38 | 0.17 | 0.53 | 0.24 | .422 | 0.26 | .195 | 0.41 |
| *4 months (Jan)* | 0.51 | 0.16 | 0.66 | 0.19 | 0.43 | 0.18 | 0.56 | 0.21 | .146 | 0.50 | .111 | 0.50 |
| *6 months (Mar)* | 0.60 | 0.21 | 0.68 | 0.19 | 0.47 | 0.15 | 0.59 | 0.24 | .048 | 0.71 | .192 | 0.41 |
| *9 months (June)* | 0.66 | 0.22 | 0.72 | 0.19 | 0.50 | 0.17 | 0.63 | 0.22 | .029 | 0.79 | .169 | 0.44 |

*Note.* ID = intellectual disability.
